# Supplementary material
Source: PubMed Central journal article supplement (PMC4747872)
Supplement: ijmsv13p0068s1.pdf [file ijmsv13p0068s1.pdf]

Figure S1.

Effect of severe pre-acidification (pH 7.0; N = 4) on the contraction induced by 60 mM KCl in isolated rat aortae. The contractile response induced by isotonic 60 mM KCl solution was measured in all of the isolated rat aortae and used as a reference value (100%) for contraction induced by 60 mM KCl. The isotonic 60 mM KCl solution was made by replacing the NaCl in Krebs solution with an equimolar amount of KCl. After washing out the isotonic 60 mM KCl solution from the organ bath, the isometric tension was returned to baseline. After isolated endothelium-intact and endothelium-denuded aortae were pretreated with pH 7.4 or 7.0 Krebs solution for 15 min, 60 mM KCl was added to the organ bath, and then 60 mM KCl-induced contraction was measured. Data are shown as the mean  $\pm$  SD and are expressed as the percentage of contraction induced by isotonic 60 mM KCl. N indicates the number of thoracic aortae.

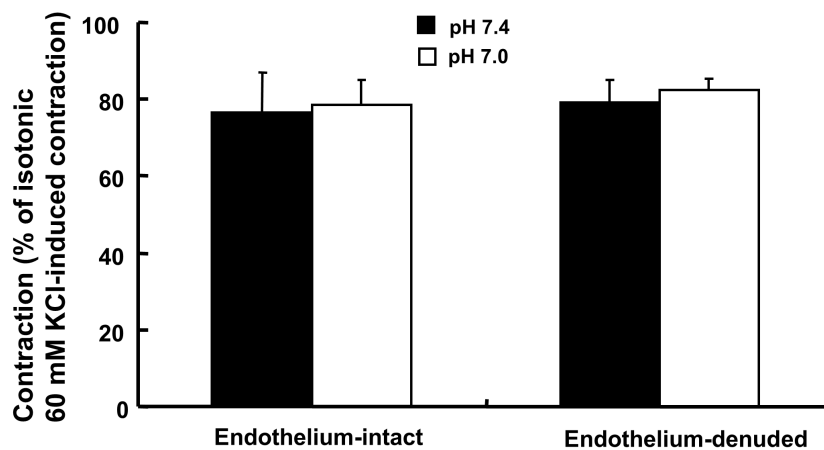

**Figure S1**
